# Supplementary material for: A simple dispersive-micro-solid phase extraction based on a colloidal silica sorbent for the spectrophotometric determination of Fe(ii) in the presence of tetrabutylammonium bromide
Source: Royal Society of Chemistry journal article supplement (doi:10.1039/c7nj04172a), 2018-01-01
Supplement: c7nj04172a1.pdf [file c7nj04172a1.pdf]

### Effect of centrifugation time

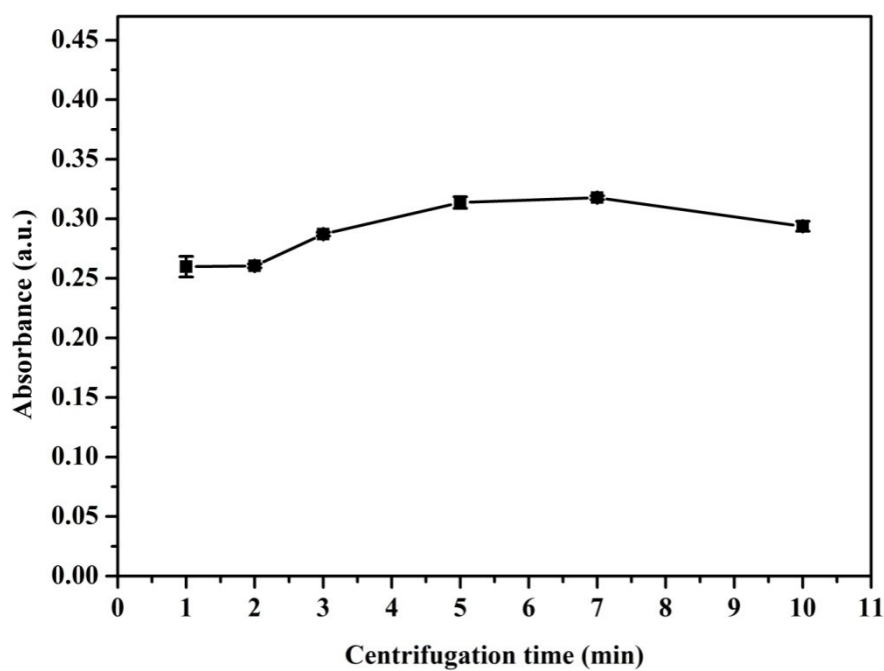

Fig. s1 Effect of the centrifugation time on the preconcentration of Fe<sup>2+</sup> ion.
